# Supplementary material for: A Multimodal Biomarker Predicts Dissemination of Bronchial Carcinoid
Source: MDPI journal article supplement (doi:10.3390/cancers14133234), 2022-06-30
Supplement: s1 [file s1]

Table S1

| Antibody | Company        | Clone      | Species | Reference number | Dilution | IHC incubation time (min) | Detection method |
|----------|----------------|------------|---------|------------------|----------|---------------------------|------------------|
| CD044    | Ventana        | SP37       | Rb      | 06364985001      | RTU      | 32                        | Optiview         |
| MIB 1    | Dako           | MIB1       | Mo      | M7240            | 1/50     | 32                        | Optiview         |
| OTP      | Sigma-Aldrich  | Polyclonal | Rb      | HPA059342        | 1/50     | 64                        | Optiview         |
| RB       | BD Biosciences | G3-245     | Mo      | 554136           | 1/1000*  | 32                        | Optiview         |
| p16      | Ventana        | E6H4       | Mo      | 06695248001      | 1/2      | 32                        | Optiview         |

Table S1. Characteristics of antibodies used for immunohistochemistry; IHC: immunohistochemistry; RTU: ready-to-use; \* in Dako Antibody Diluent.
