# Supplementary material for: A Multimodal Biomarker Predicts Dissemination of Bronchial Carcinoid
Source: MDPI journal article supplement (doi:10.3390/cancers14133234), 2022-06-30
Supplement: s1 [file s1]

| Variable                        | Total (%) | TC (%)  | AC (%)  | <i>p</i> -value* |
|---------------------------------|-----------|---------|---------|------------------|
| OTP positive                    | 57 (72)   | 16 (20) | 41 (52) | 0.001            |
| OTP negative                    | 22 (28)   | 15 (19) | 7 (9)   |                  |
| CD44 positive                   | 62 (78)   | 19 (24) | 43 (54) | 0.003            |
| CD44 negative                   | 17 (22)   | 12 (15) | 5 (6)   |                  |
| Ki-67 <5%                       | 59 (75)   | 15 (19) | 44 (56) | <0.001           |
| Ki-67 ≥5%                       | 20 (25)   | 16 (20) | 4 (5)   |                  |
| No distant metastasis           | 72 (91)   | 30 (38) | 42 (53) | 0.236            |
| Distant metastasis <sup>†</sup> | 7 (9)     | 1 (1)   | 6 (8)   |                  |

Table S3. Characteristics of patients with neutral biomarker profile (*n*=79); TC: typical carcinoid; AC: atypical carcinoid; † occurrence of distant metastasis during follow up; \* calculated using the Chi-Squared or Fisher's Exact test.
