# Supplementary material for: A Multimodal Biomarker Predicts Dissemination of Bronchial Carcinoid
Source: MDPI journal article supplement (doi:10.3390/cancers14133234), 2022-06-30
Supplement: s1 [file s1]

| Marker | Number of IHC positive cases (%) <sup>~</sup> |             |                              | Median H-score / Ki-67 score (SD) |           |                              |
|--------|-----------------------------------------------|-------------|------------------------------|-----------------------------------|-----------|------------------------------|
|        | TC                                            | AC          | <i>p</i> -value <sup>§</sup> | TC                                | AC        | <i>p</i> -value <sup>^</sup> |
| Rb     | 112/112 (100)                                 | 59/59 (100) | NA                           | 180 (77)                          | 200 (82)  | 0.102                        |
| p16    | 30/111* (27)                                  | 21/59 (36)  | 0.246                        | 0 (32)                            | 0 (49)    | 0.126                        |
| OTP    | 96/112 (86)                                   | 45/59 (76)  | 0.123                        | 240 (106)                         | 300 (126) | 0.608                        |
| CD44   | 96/111* (86)                                  | 43/58* (74) | 0.046                        | 300 (104)                         | 300 (134) | 0.055                        |
| Ki-67  | NA                                            | NA          | NA                           | 1 (3)                             | 2 (4)     | 0.134                        |

Table S2. Immunohistochemistry results for TC and AC; IHC: immunohistochemistry; TC: typical carcinoid; AC: atypical carcinoid; \* one missing p16 or CD44 value; ~ excluding three cases with missing mitotic figures; § calculated using the Chi-Squared test; ^ calculated using the Mann-Whitney U test; significant *p*-values are reported in bold.
