# Supplementary material for: A Multimodal Biomarker Predicts Dissemination of Bronchial Carcinoid
Source: MDPI journal article supplement (doi:10.3390/cancers14133234), 2022-06-30
Supplement: s1 [file s1]

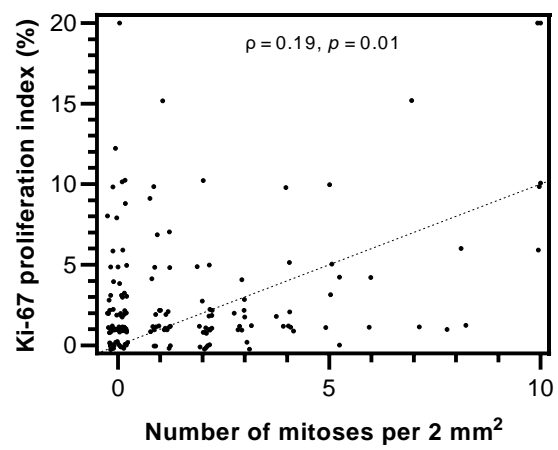

Figure S1. Spearman's rho correlation between Ki-67 proliferation index and number of mitoses per 2 mm<sup>2</sup>;  $\rho$ : Spearman rank-order correlation coefficient.
